# Supplementary material for: Altered RNA splicing initiates the viral mimicry response from inverted SINEs following type I PRMT inhibition in Triple-Negative Breast Cancer
Source: Research Square preprint supplement (doi:10.21203/rs.3.rs-649284/v1), 2021-07-12
Supplement: Supplementary file 2 [file e00dab62490c6d217af4e67f.pdf]

Table S1: *In Vitro* Kd value for indicated chemical probes.

| Type I PRMTs | Kd (nM) |        |       |        |
|--------------|---------|--------|-------|--------|
|              | MS023   | SGC707 | MS049 | TP-064 |
| PRMT1        | 39      |        |       |        |
| PRMT3        | 135     | 31     |       |        |
| PRMT4        | 93      |        | 44    | <10    |
| PRMT6        | 4       |        | 63    |        |
| PRMT8        | 5       |        |       |        |

**A**

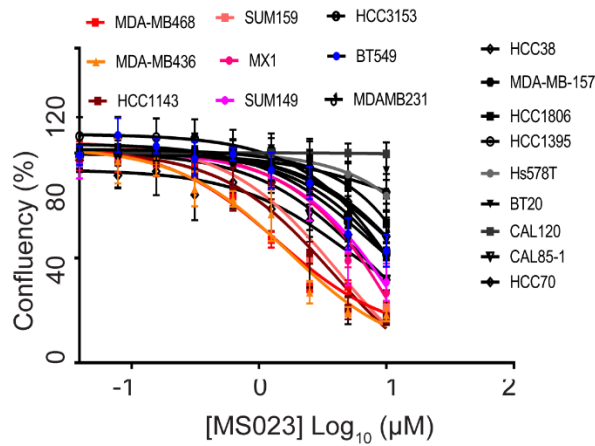

**B**

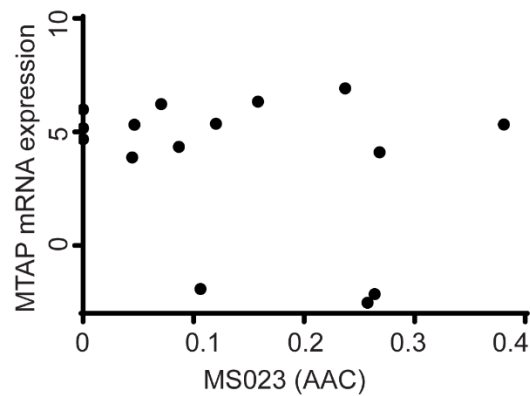

**C**

|            | AAC      | TP53 | SRSF1 | SRSF2 |
|------------|----------|------|-------|-------|
| MDA-MB-468 | 0.380697 |      |       |       |
| HCC1143    | 0.268349 |      |       |       |
| MDA-MB-436 | 0.248347 |      |       |       |
| CAL85-1    | 0.158293 |      |       |       |
| MDA-MB-231 | 0.122944 |      |       |       |
| HCC1395    | 0.10625  |      |       |       |
| HCC38      | 0.086839 |      |       |       |
| HCC1806    | 0.04663  |      |       |       |
| Hs-578-T   | 0.044544 |      |       |       |
| BT-549     | 0        |      |       |       |
| CAL-120    | 0        |      |       |       |
| MDAMB 157  | 0        |      |       |       |

missense-mutation    frameshift    splice site

**D**

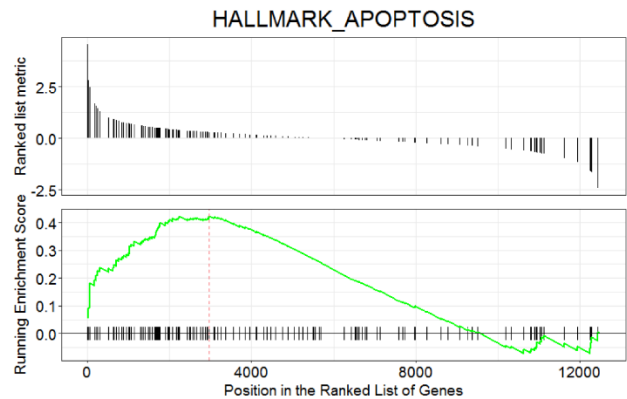

**Supplementary Figure 1.** (A) Growth curves of 17 TNBC cell lines with indicated concentrations of MS023 treatment for 5 days. (B) Correlation between area above curve (AAC) for MS023 and MTAP mRNA expression for 17 TNBC cell lines. (C) Correlation of AAC and

common gene mutations for 13 TNBC cell lines. Genetic alteration data downloaded from CCLE database (<https://portals.broadinstitute.org/ccle>). **(D)** GSEA of the apoptosis pathway after MS023 treatment.

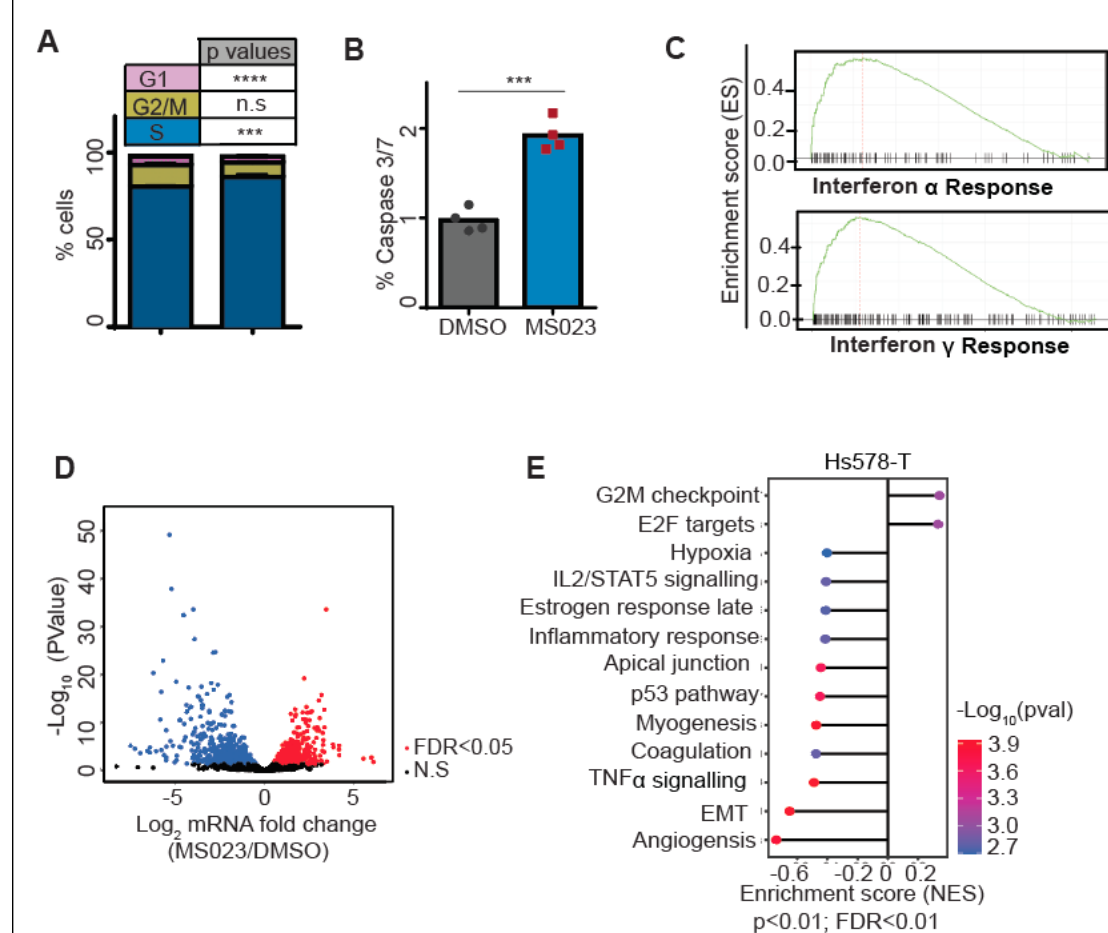

**Supplementary Figure 2.** **(A)** Flow cytometry cell cycle analysis for MDA-MB-468 cells cultured with or without MS023 for 72h. Data shown are mean  $\pm$  s.d. of n = 3 independent assays. A one-way ANOVA was used to derive the p values. \*\*\*p < 0.001, \*\*\*\*p < 0.0001; n.s means not significant. **(B)** Apoptotic cell counts of MS023 treated for 3 days by caspase 3/7 staining. Data shown are mean  $\pm$  s.d. of n = 3 independent experiments. A one-way ANOVA was used to derive the p values. \*\*\*p < 0.001; n.s means not significant. **(C)** GSEA analysis for gene sets associated with interferon responses in MDA-MB-468 cell line following MS023 treatment. **(D)** Volcano plot of log2 fold change for genes significantly upregulated (red in the right panel) or downregulated (blue in left panel) upon MS023 treatment (n=3) in Hs578-T cell line. **(E)** Gene set enrichment analysis (GSEA) of all ranked differentially expressed genes in Hs578-T after MS023 treatment.

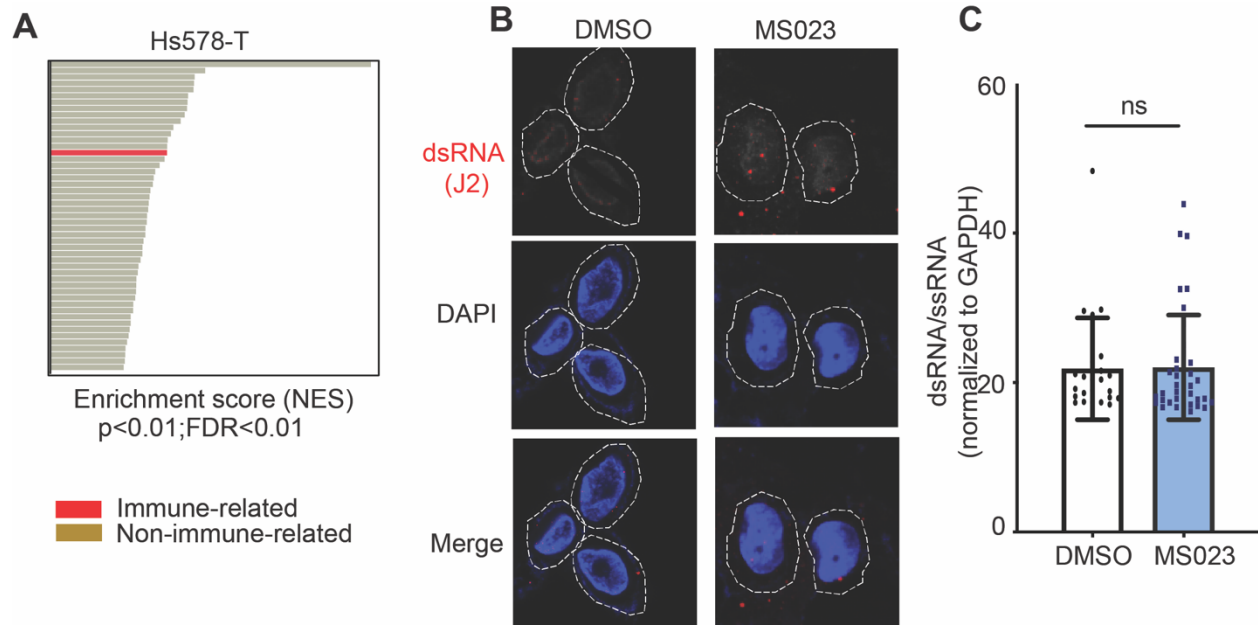

**Supplementary Figure 3.** (A) Scatterplot of upregulated gene sets enriched in Hs578-T cell after MS023 treatment. Gene sets associated with immune response are red. (B) Cellular dsRNA was evaluated with anti-dsRNA (J2) immunofluorescence. (C) Quantification of cytoplasmic dsRNA signal intensity.
